# Supplementary material for: Globally significant yields of dissolved organic carbon from small watersheds of the Pacific coastal temperate rainforest
Source: Copernicus journal article supplement (doi:10.5194/bg-2017-5), 2017-01-19
Supplement: Supplementary file 1 [file bg-2017-5-supplement.pdf]

# 1 **Supplemental Material**

## 2 **S1. Watershed and soil attributes**

### 3 **S1.1 Extent of wetlands and lakes**

4           Estimates of lake and wetland cover were extracted from the Province of British  
5 Columbia Terrestrial Ecosystem Mapping (TEM) (Green, 2014; Gonzalez Arriola et al., 2015).  
6 The estimate of wetland cover is derived by combining the cover of nine ecosystem classes  
7 typically considered to have wet (hygric to subhydryc) to very wet (hydric) soils, including  
8 blanket bogs, bog woodlands, basin bogs, fens and swamps (Banner et al., 1993, MacKenzie and  
9 Moran, 2004). This metric omits the widespread bog forests of Calvert and Hecate Islands,  
10 which have very moist (subhygric) to wet soil moisture regimes (Banner et al., 1993) and are  
11 transitional between upland and wetland ecosystems. The TEM dataset has polygons containing  
12 up to three ecosystem classes, with no information on the location of classes within polygons.  
13 Where TEM a polygon was intersected by watershed boundaries, we assumed a homogenous  
14 distribution of ecosystem classes within the polygon. After summing the cover of wetlands in  
15 each watershed we calculated the percentage of land (watershed area less lakes) covered by  
16 wetlands.

### 17 **S1.2 Soil sampling and depth predictions**

18           Soil data were collected at a total of 353 field sites. Of these sites, 322 were located at  
19 fixed distances along transects established using a conditioned latin hypercube sampling design  
20 (Minasny and McBratney, 2006). The transect method was adopted because access on this  
21 remote island is restricted, and it was not possible to visit all of the points identified in the  
22 original hypercube procedure. The effect was to have small clusters of points that were well -  
23 distributed and representative of the study area. At all sites, the thickness of organic horizons,

24 thickness of mineral horizons, and total soil depth to bedrock were recorded, along with  
25 observations needed for categorization according to the Canadian System of Soil Classification  
26 (Soil Classification Working Group, 1998) and the British Columbia terrain classification  
27 (Howes and Kenk, 1997). For some sites, total depth exceeded the reach of sampling tools, so  
28 recorded thicknesses were likely conservative. Data were also collected at an additional 31 sites  
29 that were located in previously established ecosystem inventory plots with the same soil  
30 attributes (Giesbrecht et al., 2015). In addition to field-sampled points, 40 sites with exposed  
31 bedrock (0cm soil depth) were located using aerial photography.

32 Total organic horizon thickness, total mineral horizon thickness, and total soil depth were  
33 combined with a suite of topographic, vegetation, and remote sensing data for each sampling  
34 point, and the resulting dataset was used to train a random forest model (randomForest package  
35 in R; Liaw and Wiener, 2002) which predicted soil depth values and soil/terrain types for all  
36 points on the landscape. Depth predictions represent a modification of the procedure used by  
37 Scarpone et al. (2016) for depth predictions in interior British Columbia.

## 38 **S2. Hydrology- Rating curve calculations of stream discharge and error analysis**

### 39 **S2.1 Stage Measurements**

40 Stations were installed in the spring and early fall of 2014 as part of a telemetry network  
41 allowing for near real time download of data. At each station, an OTT PLS – L (OTT 2016)  
42 pressure transducer (0 - 4 m range SDI-12) was installed. Each sensor was connected to a  
43 CR1000 (Campbell Scientific, 2015) data logger. Stage measurements were recorded every five  
44 minutes with a five second sampling interval and mean, max, min and standard deviation of  
45 stream stage recorded over each five minute period. Each watershed also had stand-alone  
46 Odyssey Capacitance Water Level recorder (Data Flow Systems PTY Ltd 2016) installed in

47 proximity to the pressure transducer to act as a back-up in case of sensor or data logger  
48 malfunction.

## 49 **S2.2 Discharge Measurements**

50 Stream discharge was measured using multiple methods. Low and moderate flows,  
51 generally below  $0.5 \text{ m}^3 \text{ s}^{-1}$ , were measured using the velocity area method midsection discharge  
52 equation (ISO, 1992; ISO, 1997). The flow velocities were measured with the Swoffer 2100  
53 propeller type mechanical current meter (Swoffer Instruments Inc., Seattle, USA) or the Sontek  
54 Flowtracker acoustic doppler velocimeter (SonTek, San Diego, USA). Flow velocities were  
55 averaged by the Swoffer over a five second measurement interval and by the Flowtracker over a  
56 30 second measurement interval for each location. A suitable river cross-section site was defined  
57 by: a) general flow direction perpendicular to the cross-section line, b) uniform stream bed  
58 conditions, and c) constrained flow conditions with no back eddies and low turbulence.  
59 At some watersheds, multiple velocity-area sites were used depending on conditions at time of  
60 measurement.

61 At flows greater than  $0.5 \text{ m}^3 \text{ s}^{-1}$ , salt dilution was the primary method to measure  
62 discharge, specifically salt in solution (“salt solution”) as described by Moore (2005). Discharge  
63 was calculated using the following formula:

$$64 \quad Q = \frac{V}{\sum RC_t \cdot t_{\text{int}}} \quad (4)$$

65 where  $V$  represents the volume of salt solution ( $\text{m}^3$ ),  $RC_t$  the relative concentration of salt  
66 solution ( $\text{mL mL}^{-1}$ ) and  $t_{\text{int}}$  is the time interval of measurement.  $RC_t$  is obtained using a relative  
67 concentration, related to electrical conductivity (EC):

$$68 \quad RC_t = (EC_t - EC_0) \cdot CF \quad (5)$$

69 where  $EC_t$  is the temperature corrected EC measured at time  $t$  ( $\mu\text{S cm}^{-1}$ ),  $EC_0$  is the baseline  
70 conductivity of the stream ( $\mu\text{S cm}^{-1}$ ) defined as the five minute average prior to the salt wave,  
71 and CF is the calibration factor. The end of the salt wave was defined as the point in which the  
72 five minute EC average equaled  $EC_0$ . In some instances the post-five minute average would not  
73 return to  $EC_0$  due to changes in background chemistry not associated with the salt dump. When  
74 this occurred,  $EC_0$  was determined by linear interpolation for baseline EC, pre and post  
75 measurement.

76 The CF is defined as the relationship between additions of primary solution (made up of  
77 salt solution and stream water) to a known volume of secondary solution (stream water only),  
78 with the resulting slope of the line corresponding to the CF value. The primary solution was  
79 typically made up of 10 mL salt solution (used in discharge measurement) added to 1000 mL of  
80 stream water. Then, 2 or 5 mL increments of the primary solution was pipetted into 3000 mL of  
81 the secondary solution, and corresponding changes in EC were recorded. Linear regression was  
82 performed to determine slope of the line.

83 Due to difficulties associated with being on location to measure high discharge, a “salt  
84 dilution system” was designed using the salt solution method described above. The system was  
85 entirely automated and located within an extensive telemetry network enabling remote activation  
86 off-site or through pre-programmed stream stages where discharge measurements had not been  
87 previously measured.

88 A volume of salt solution, stored in two, 200 L barrels on site, allowed for up to thirty  
89 measurements between refills. Recharging of the salt solution reservoir was done manually and  
90 the CF completed following the refill and prior to the next refill (the reservoir was designed to  
91 ensure that at least 5 L of solution remained after the final discharge measurement), for a

92 minimum of two CF's between refills. When the water level reached a predefined stage, a signal  
93 was sent to release a pre-determined volume of salt solution from a reservoir connected to the  
94 salt solution storage barrels. To increase the accuracy of this volume, the salt solution was first  
95 pumped into a stainless steel cylinder with a pressure transducer at the bottom to measure water  
96 depth, and in turn volume. The solution was then transferred to a dumping mechanism located  
97 above the stream designed for near instantaneous release. Upon initiation of the salt solution  
98 dump sequence, a second command was sent to a downstream data logger to activate two Global  
99 Water-WQ Cond sensors (Global Water instrumentation, Inc., College Station, USA) to measure  
100  $EC_t$  at one second intervals, and therefore capture the passing salt wave. Once the dump  
101 sequence was completed, the  $EC_t$  data were transmitted via the telemetry network to a server  
102 accessed via the internet. The volume of salt depended on estimated discharge measurements,  
103 with maximum EC measurements targeted to be no more than 40 uS above background, well  
104 below the most sensitive toxicity threshold of 400 mg L<sup>-1</sup> (Moore 2004a, 2004b).

## 105 **S2.3 Error and uncertainty analysis**

### 106 **S2.3.1 Discharge measurement error analysis**

107 Errors associated with manual direct discharge measurements were estimated using  
108 statistical techniques and on-site observations. For the velocity-area method, discharge  
109 uncertainty was calculated using the Interpolated Variance Estimator (IVE) (Cohn et al., 2013).  
110 For the salt dilution method, a statistical and site specific uncertainty estimation method was  
111 developed.

### 112 **S2.3.2 Uncertainty analysis for the velocity-area measurements**

113  
114 As described in Cohn et al. (2013), the IVE was used to estimate uncertainty in velocity  
115 area discharge measurements. It is based on the assumption that depth and velocity vary

116 gradually across a channel cross-section and that depth and velocity vary linearly between  
 117 adjacent stations. The difference between the assumed and the measured value is used to  
 118 calculate measurement uncertainty. In addition, uncertainties associated with calibration and  
 119 systemic errors in the width, depth, and velocity were assumed to be 1% for the Sontek  
 120 Flowtracker (the accuracy of the device calibration; Sontek/YSI, 2007) and 5% for the Swoffer  
 121 current meter, due to increased potential uncertainty from the shorter time interval used to  
 122 determine average velocity. Total uncertainty was estimated based on the above uncertainties  
 123 and the number of measurement stations (see Cohn et al. 2013).

### 124 **S2.3.3 Salt dilution discharge uncertainty**

125  
 126 The discharge uncertainty for salt dilution measurements was estimated using the  
 127 sensor resolution, calibration errors, salt volume errors, and salt mixing errors. Uncertainty ( $u_Q$ ),  
 128 associated with discharge calculated from a conductivity sensor is based on the following:

$$129 \quad u_Q = u_v + \frac{\sum_{i=1}^m ((u_{EC,i} + u_{CF}) C_i)}{\sum_{i=1}^m C_i} \quad (6)$$

130  
 131 Where  $u_v$  is the relative uncertainty due to salt volume error (%),  $u_{EC,i}$  is the relative uncertainty  
 132 in EC measurement  $i$  due to the resolution of the sensor (%),  $u_{CF}$  is the relative uncertainty in CF  
 133 (%),  $C_i$  is the calculated salt concentration at measurement  $i$  ( $g\ m^{-3}$ ), and  $m$  is the total number of  
 134 EC measurements.

135 Error associated with determining the volume of salt ( $u_v$ ) was estimated by:

$$136 \quad u_v = \frac{\Delta v}{v} \cdot 100 \quad (7)$$

137 where  $V$  is the volume of salt solution released to the stream (L), and  $\Delta V$  is the estimated error in  
 138 salt solution volume (L). The error in solution volume was estimated based on the resolution (1  
 139 mm) of the pressure transducer inside the stainless steel cylinder salt dump reservoir. With an

142 uncertainty of 0.5 mm in solution height inside the cylinder and a cylinder diameter of 304 mm,  
143 the uncertainty in solution volume for each release was 36.3 mL. Because the cylinder was never  
144 completely emptied, two level measurements were made to calculate water, thus total maximum  
145 error in solution volume ( $\Delta V$ ) was 72.6 mL.

146 Electrical conductivity measurement uncertainty ( $u_{EC}$ ), dependent on the resolution of  
147 the conductivity sensor (Res) is described below:

$$u_{EC} = \frac{0.5 \cdot Res}{EC} \cdot 100 \quad (8)$$

148  
149  
150 Uncertainty related to  $u_{CF}$  was a function of the errors associated with the measurement  
151 of salt concentration of the primary and secondary solution, a combination of volumetric error of  
152 the primary solution ( $\pm 0.3$  mm, volumetric flask precision), the secondary solution ( $\pm 3.0$  mm  
153 volumetric flask precision plus rain splash and field conditions) and each primary solution dose  
154 (0.006 mL, based on precision of the pipette) added in 2 or 5 mL increments. Uncertainty of the  
155 CF was derived from the maximum variation in slope, a product of the salt concentration error  
156 ranges. The calibration regression curve was plotted using three data points for each conductivity  
157 measurement: the assumed salt concentration, the assumed salt concentration plus maximum  
158 error, and the assumed salt concentration minus maximum error (Figure S2.1). Next, the  
159 maximum variation of slope was calculated using the standard deviation of slope ( $\sigma_s$ ):

$$\sigma_s = \sqrt{\frac{\left(\frac{1}{n-2}\right) \sum_{i=1}^n (y_i - \hat{y}_i)^2}{\sum_{i=1}^n (x_i - \bar{x})^2}} \quad (9)$$

160  
161 where n is the number of data points,  $y_i$  is the assumed salt concentration ( $\pm$  error) of  
162 measurement i ( $\text{mL mL}^{-1}$ ),  $\hat{y}_i$  is the modelled salt concentration ( $\text{mL mL}^{-1}$ ),  $x_i$  is the measured  
163 electrical conductivity of measurement i ( $\mu\text{S cm}^{-1}$ ), and  $\bar{x}$  is the mean average electrical  
164

165 conductivity ( $\mu\text{S cm}^{-1}$ ). Finally, the CF relative uncertainty ( $u_{\text{CF}}$ ) was defined as two times the  
166 standard deviation of slope divided by the CF:

$$167 \quad u_{\text{CF}} = (2 \cdot \sigma_s) / \text{CF} \quad (10)$$

168  
169 If the EC sensors showed different EC readings and confirmed the salt was not  
170 completely mixed at the measurement site, additional uncertainty was added to the discharge  
171 measurement. To measure the degree of salt mixing at the measurement site, discharges  
172 calculated from both conductivity sensor measurements were compared, while taking their  
173 uncertainties into account:

$$174 \quad M = \frac{(Q_2 - \varepsilon_{Q_2}) - (Q_1 + \varepsilon_{Q_1})}{(Q_1 + \varepsilon_{Q_1})} \cdot 100 \quad (11)$$

175 where M is the relative uncertainty due to improper mixing (%), Q1 is the lower discharge value  
176 ( $\text{m}^3 \text{s}^{-1}$ ), Q2 is the higher discharge value ( $\text{m}^3 \text{s}^{-1}$ ),  $\varepsilon_{Q_1}$  is the absolute uncertainty of the lower  
177 discharge value, derived from  $u_Q$  (Equation 6) and  $\varepsilon_{Q_2}$  is the absolute uncertainty of the higher  
178 discharge value. If  $M \leq 0$ , the salt was assumed to be properly mixed. Any positive outcome of  
179 M implies incomplete mixing and is added to the total uncertainty of the discharge measurement.  
180

#### 181 **S2.4 Rating curve development and uncertainty**

182  
183 Discharge is related to stage through the formula:

$$184 \quad Q = a(h - h_0)^b \quad (12)$$

185 where Q is discharge ( $\text{m}^3 \text{s}^{-1}$ ), h is stage level (m),  $h_0$  is the water level at zero flow (m) and a and  
186 b are coefficients specific to the gauging station of a river. The values for  $h_0$ , a, and b are  
187 obtained by the curve fitting results of simultaneous stage and discharge measurements. For this  
188 work, stage-discharge curves were created using a non-linear least-squares fitting Python model  
189 (lmfit; LMFIT Development Team, 2015). This model approximates the variables (a, b, and  $h_0$ )  
190 by minimizing the residuals scaled by data uncertainties:



191 
$$[Q_i^{\text{meas}} - Q_i^{\text{model}}(v)]/\varepsilon_i \quad (13)$$

192 where  $Q_i^{\text{meas}}$  is the measured discharge ( $\text{m}^3 \text{s}^{-1}$ ),  $Q_i^{\text{model}}$  is the fitted discharge ( $\text{m}^3 \text{s}^{-1}$ ),  $v$  the set  
193 of variables in the model ( $a$ ,  $b$  and  $h_0$ ) to be optimized, and  $\varepsilon_i$  the uncertainty in the discharge  
194 measurement. This was a two step process where the curve was first fit taking into account  
195 uncertainties related to  $Q$  and then fit again taking into account uncertainties in  $h$ .

196 As described above, uncertainty for individual discharge measurements were accounted  
197 for in the curve fitting process, with measurements of greater uncertainty having less influence  
198 on position of the curve. To account for uncertainty in the stage discharge relation, 95%  
199 confidence intervals were created per Herschy (1994) and applied to the final discharge times-  
200 series as an estimate of discharge.

## 201 **S2.5 Results of stream discharge measurement and calculations**

202 A total of 168 total measurements, including 92 measures made using the automated  
203 system, were used to develop rating curves for each watershed (Figure S2.1; Floyd et al., 2016).  
204 Watershed 703 had the highest total discharge over the study period, which was more than the  
205 combined total from watersheds 626, 819, 844 and 1015. Total discharge calculated from the  
206 95% confidence intervals from the rating curves were  $\pm 6.5\%$  of the mean of all watersheds, with  
207 a range between  $\pm 2.93\%$  (708) and  $\pm 9.98\%$  (819) (Table S2.3). In general, discharge data from  
208 watershed 708 had the lowest uncertainty, due to it having the most discharge measurements and  
209 the best developed rating curve. Watershed 819 had the highest uncertainty largely due to the  
210 limited number of high flow discharge measurements on the rating curve (max measured was  $4.5$   
211  $\text{m}^3 \text{s}^{-1}$ ) and variation in stage during the discharge measurements at high flow. Four of the seven  
212 watersheds had total discharge measurements less than  $\pm 5.0\%$  of the estimated measurements

213 from the rating curve, and none were > 10% for the entire project study period, however for  
214 water year 2015/2016, 819 had a total discharge uncertainty of ±13.0%.

215 **Figure S2.1.** Stage discharge rating curves for seven focal watersheds. Confidence intervals  
216 (95%) are calculated based on Herschy (1994). Error bars represent uncertainty from individual  
217 measurements.

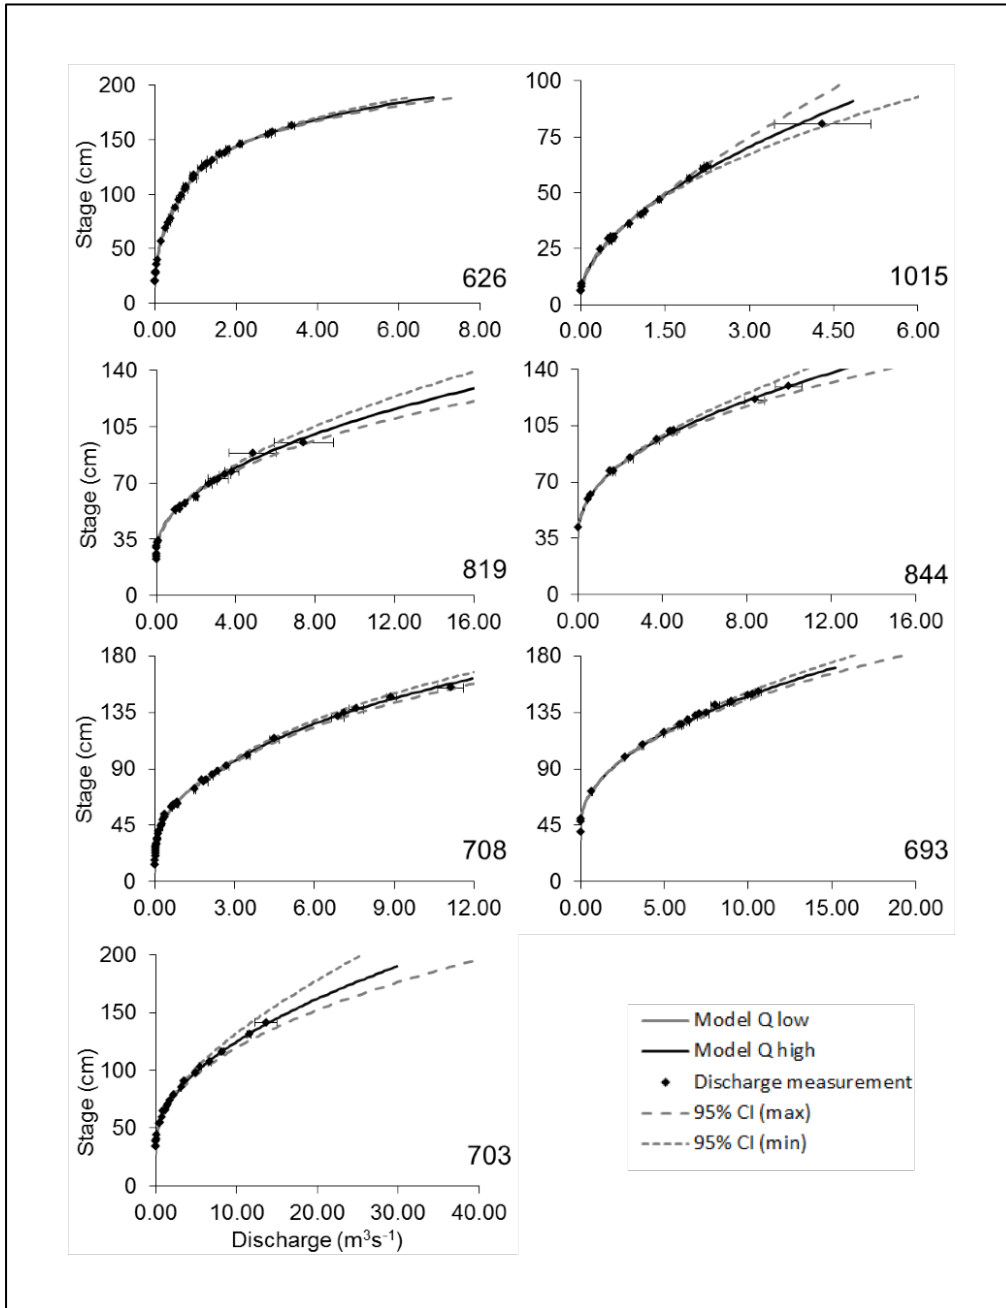

218  
219  
220  
221

222 **Table S2.3.** Uncertainty (%) in total discharge, by water year and over the entire study period,  
 223 based on rating curve confidence intervals (95%). Values are plus or minus the modelled output.  
 224

| <i>Watershed</i> | <i>2014-15</i> | <i>2015-16</i> | <i>2014-2016</i> |
|------------------|----------------|----------------|------------------|
| 626              | 5.57           | 5.54           | 5.55             |
| 693              | 3.35           | 2.97           | 3.19             |
| 703              | 10.14          | 9.37           | 9.83             |
| 708              | 2.93           | 2.93           | 2.93             |
| 819              | 7.49           | 13.01          | 9.98             |
| 844              | 4.98           | 4.47           | 4.78             |
| 1015             | 9.01           | 8.58           | 8.84             |

225  
 226  
 227  
 228  
 229  
 230  
 231  
 232

**S3. Generating model estimates of DOC flux using rloadest**

**Table S3.1:** The number of samples and specific regression model used by rloadest for calculating stream loads. Estimated bias of each model shows relatively low overall bias for each model, with 844 clearly showing the highest bias.

| Watershed | n  | Model # | Regression model                                                              | Estimated % bias |
|-----------|----|---------|-------------------------------------------------------------------------------|------------------|
| 626       | 23 | 7       | $a_0 + a_1 \ln Q + a_2 \sin(2\pi dtime) + a_3 \cos(2\pi dtime) + a_4 dtime$   | 2.026            |
| 1015      | 24 | 7       | $a_0 + a_1 \ln Q + a_2 \sin(2\pi dtime) + a_3 \cos(2\pi dtime) + a_4 dtime$   | -2.502           |
| 819       | 23 | 7       | $a_0 + a_1 \ln Q + a_2 \sin(2\pi dtime) + a_3 \cos(2\pi dtime) + a_4 dtime$   | 2.011            |
| 844       | 20 | 3       | $a_0 + a_1 \ln Q + a_2 dtime$                                                 | -11.49           |
| 708       | 24 | 6       | $a_0 + a_1 \ln Q + a_2 \ln Q^2 + a_3 \sin(2\pi dtime) + a_4 \cos(2\pi dtime)$ | -0.206           |
| 693       | 23 | 6       | $a_0 + a_1 \ln Q + a_2 \ln Q^2 + a_3 \sin(2\pi dtime) + a_4 \cos(2\pi dtime)$ | 0.092            |

233  
 234  
 235  
 236  
 237  
 238  
 239  
 240  
 241  
 242  
 243  
 244  
 245  
 246  
 247  
 248  
 249  
 250

251  
252  
253  
254  
255

#### S4. PARAFAC Modeling of DOM composition

**Figure S4.2:** Fingerprint map showing the six fluorescence components determined by PARAFAC analysis.

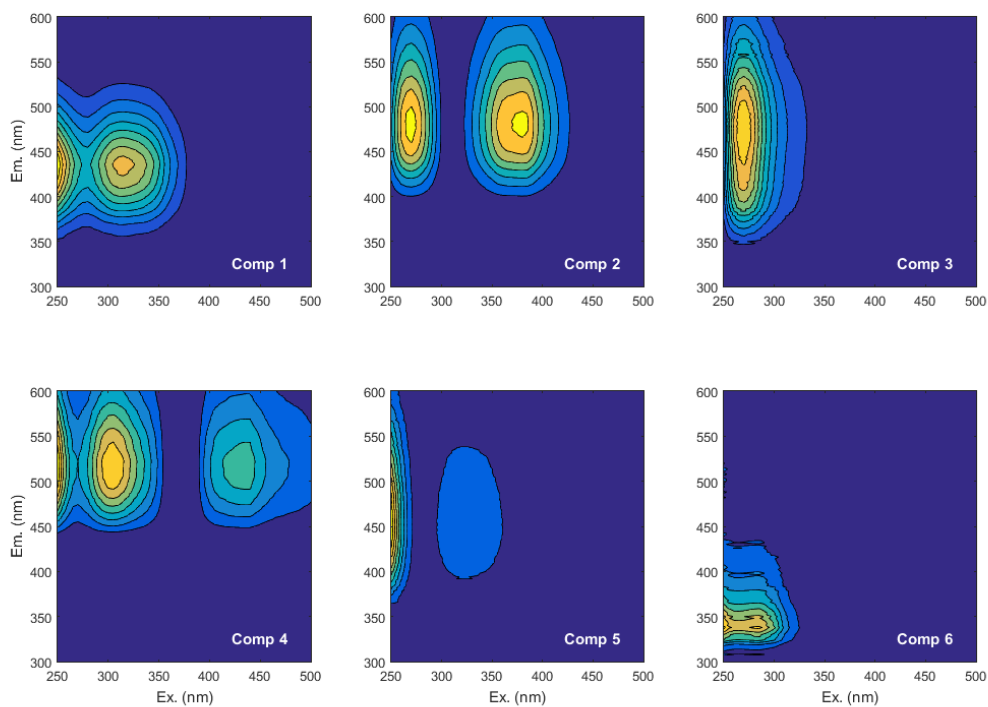

256  
257  
258  
259

**Figure S4.3:** Split half validation plots for the six fluorescence components determined by PARAFAC analysis.

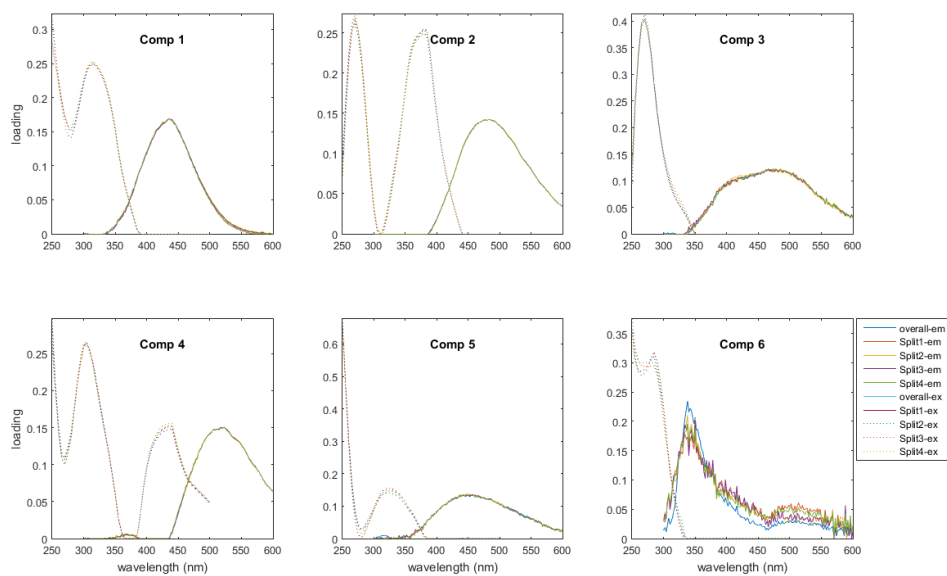

260  
 261 **Figure S4.4:** Box plots showing the percent contribution to total fluorescence from each of the six components determined by PARAFAC analysis for each of the seven watersheds used in this  
 262 study.  
 263  
 264

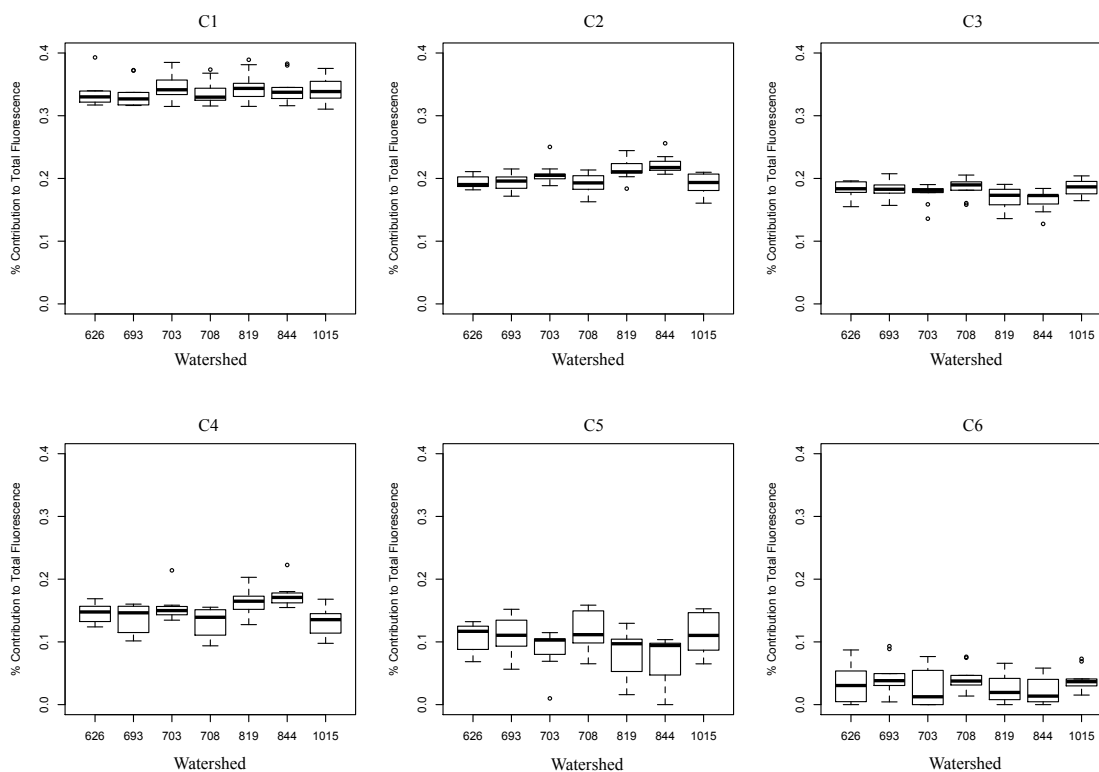

265  
266  
267  
268  
269  
270

**Table S4.1:** Locations of maximum fluorescence values and the corresponding excitation and emission wavelengths for each of the six peaks (components) determined with PARAFAC modelling.

| Component | Excitation (nm) | Excitation $F_{\max}$ | Emission (nm) | Emission $F_{\max}$ |
|-----------|-----------------|-----------------------|---------------|---------------------|
| 1         | 315             | 0.2502                | 436           | 0.1688              |
| 2         | 270             | 0.2607                | 484           | 0.1422              |
|           | 380             | 0.2539                |               |                     |
| 3         | 270             | 0.4125                | 478           | 0.1212              |
| 4         | 305             | 0.2648                | 522           | 0.1504              |
|           | 435             | 0.1512                |               |                     |
| 5         | 325             | 0.1408                | 442           | 0.1321              |
| 6         | 285             | 0.3108                | 338           | 0.2350              |

271  
272  
273  
274

**S5. Redundancy analysis: Relationships between watershed characteristics and DOC exports**

275 **Figure S5.1:** Partial-RDA Axis 1 versus Axis 3. RDA was performed under type 2 scaling.

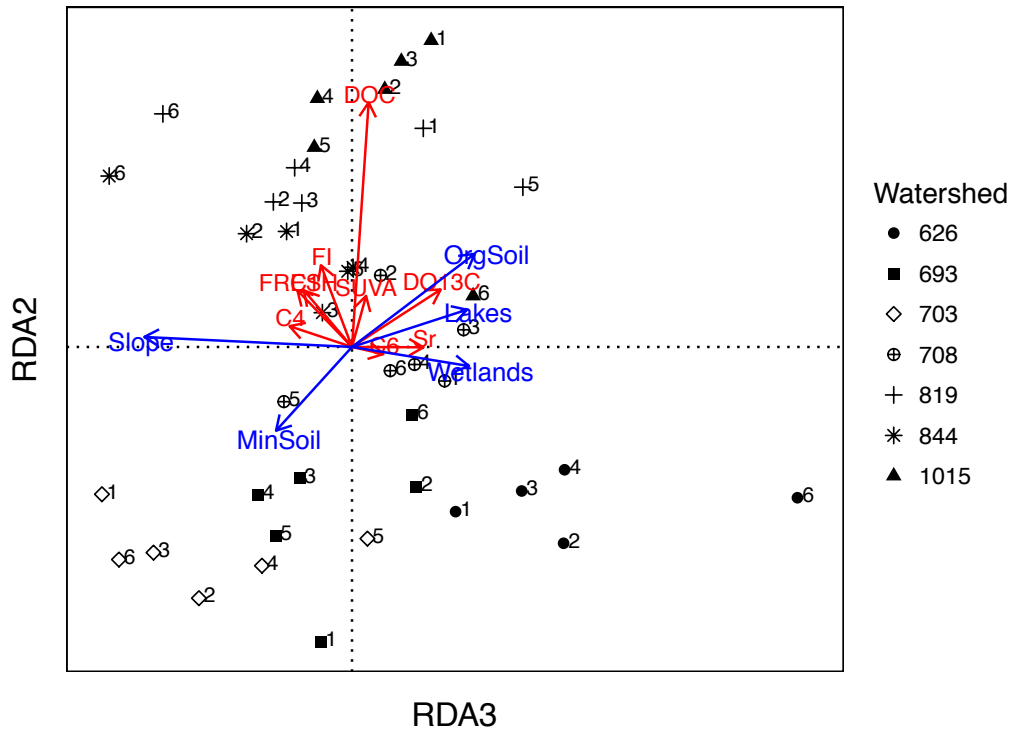

276  
277  
278

**Figure S5.2:** Partial-RDA Axis 2 versus Axis 3. RDA was performed under type 2 scaling.

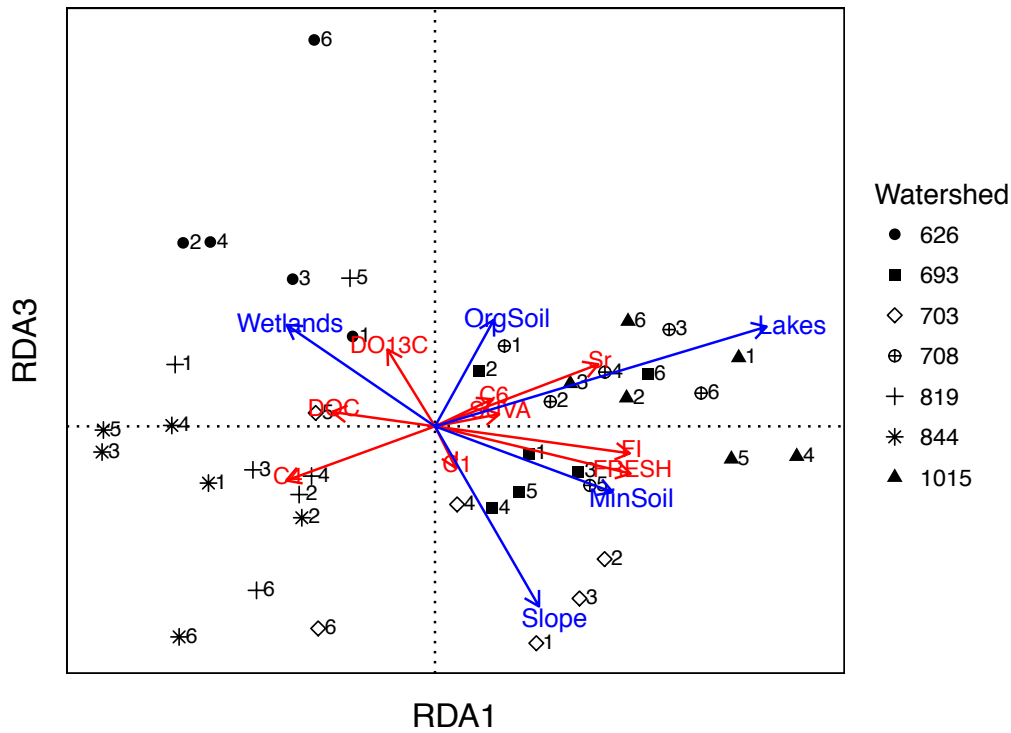

279  
280  
281

**Table S5.3:** Relative eigenvalues and the statistical significance of each axes in the partial-RDA.

| Axis | Eigen<br>-value | F<br>marginal | F<br>forward | P-<br>marginal | P-<br>forward | % total<br>variance in Y | % total variance<br>explained by all<br>axis |
|------|-----------------|---------------|--------------|----------------|---------------|--------------------------|----------------------------------------------|
| 1    | 1.420           | 18.717        | 11.047       | 0.0001         | 0.0001        | 15.78                    | 47.3                                         |
| 2    | 0.902           | 11.887        | 9.158        | 0.0001         | 0.0001        | 10.02                    | 30.1                                         |
| 3    | 0.654           | 8.622         | 8.531        | 0.0002         | 0.0002        | 7.27                     | 21.8                                         |
| 4    | 0.013           | 0.175         | 0.175        | 1.0000         | 1.0000        | 0.15                     | 0.4                                          |
| 5    | 0.011           | 0.143         | 0.143        | 0.9965         | 0.9965        | 0.12                     | 0.4                                          |

282  
283  
284  
285

**Table S5.4:** Results of permutation test on the marginal effects of terms given under the reduced RDA model.

|          | df | Variance | F      | Pr (>F) |
|----------|----|----------|--------|---------|
| Lakes    | 1  | 1.093    | 6.4789 | 0.001   |
| Slope    | 1  | 0.5722   | 3.392  | 0.005   |
| Wetlands | 1  | 0.1207   | 0.7153 | 0.651   |
| MinSoil  | 1  | 0.8403   | 4.9807 | 0.001   |
| OrgSoil  | 1  | 0.6937   | 4.1118 | 0.001   |
| Residual | 34 | 5.7359   |        |         |

286  
287

**Table S5.5:** Biplot scores for partial-RDA axes using type 2 scaling.

|          | Axis1   | Axis2   | Axis3   | Axis4   | Axis5   |
|----------|---------|---------|---------|---------|---------|
| Lakes    | 0.8471  | 0.1028  | 0.4853  | -0.1871 | 0.0349  |
| Slope    | 0.2658  | 0.0275  | -0.8769 | -0.0410 | 0.3825  |
| Wetlands | -0.3789 | -0.0527 | 0.4940  | 0.4033  | -0.6664 |
| MinSoil  | 0.4540  | -0.2311 | -0.3205 | 0.1128  | 0.7905  |
| OrgSoil  | 0.1503  | 0.2569  | 0.5178  | 0.3138  | 0.7341  |

289

## 290 References

- 291 Banner, A., MacKenzie, W., Haeussler, S., Thomson, S., Pojar, J., Trowbridge, R.: A field guide  
292 to site identification and interpretation for the Prince Rupert forest region, Handbook 26, Res.  
293 Br., British Columbia Ministry Forests, Victoria, British Columbia, 42 pp., 1993.  
294
- 295 Cohn, T.A., Kiang, J.E., Mason, Jr., R.R.: Estimating Discharge Measurement Uncertainty Using  
296 the Interpolated Variance Estimator, American Society of Civil Engineers,  
297 doi:10.1061/(ASCE)HY.1943-7900.0000695, 2013.  
298
- 299 Floyd, W.C., Korver, M.C., Owen, C., McPhail, J., Brunsting, R., van Meerveld, I.: Stage-  
300 discharge time series- Calvert Island, Hakai Institute, doi:dx.doi.org/10.21966/1.243102, 2016.  
301



302 Giesbrecht, I., Banner, A., Hoffman, K., Sanborn, P., Saunders, S., MacKinnon A.: Ecosystem  
303 comparison plots- Calvert Island, Hakai Institute, doi:dx.doi.org/10.21966/1.56481, 2016.  
304  
305 Gonzalez Arriola S., Frazer, G.W., Giesbrecht, I.: LiDAR-derived watersheds and their metrics  
306 for Calvert Island, Hakai Institute, doi:dx.doi.org/10.21966/1.15311, 2015.  
307  
308 Green, R.N.: Reconnaissance level terrestrial ecosystem mapping of priority landscape units of  
309 the coast EBM planning area: Phase 3, Prepared for British Columbia Ministry Forests, Lands  
310 and Natural Resource Ops., Blackwell and Associates, Vancouver, Canada, 2014.  
311  
312 Herschy, R.: The analysis of uncertainties in the stage-discharge relation, *Flow Meas. Instrum.*,  
313 5, 188-190, 1994.  
314  
315 Howes, D.E., and Kenk, E.: Terrain classification system for British Columbia, MOE Manual 10,  
316 2, Province of British Columbia Ministry Environment and Ministry of Crown Lands, Victoria,  
317 Canada, 102 pp., 1997.  
318  
319 ISO: Liquid flow measurement in open channels - velocity-area methods, Technical Report 772,  
320 International Organization for Standardization, Geneva, Switzerland, available at: [www.iso.org](http://www.iso.org),  
321 1979.  
322  
323 ISO Standard 9196: Liquid flow measurement in open channels - Flow measurements under ice  
324 conditions, International Organization for Standardization, Geneva, Switzerland, available at:  
325 [www.iso.org](http://www.iso.org), 1992.  
326  
327 ISO Standard 748: Hydrometry - Measurement of liquid flow in open channels using current-  
328 meters or floats, International Organization for Standardization, [www.iso.org](http://www.iso.org), 2007.  
329  
330 LMFIT Development Team: Lmfit, Least-squares Minimization with Bounds and Constraints,  
331 version 0.8.3, available at: <http://lmfit.github.io/lmfit-py/>, 2015.  
332  
333 MacKenzie, W.H., Moran, J.R.: Wetlands of British Columbia: a guide to identification, Land  
334 Manage. Handb. No. 52., Res. Br., British Columbia Ministry Forests, 287 pp., 2004.  
335  
336 Minasny, B., and McBratney, A.B.: A conditioned Latin hypercube method for sampling in the  
337 presence of ancillary information, *Comput. Geosci.*, 32, 1378-1388, 2006.  
338  
339 Moore, R.D.: Introduction to salt dilution gauging for streamflow measurement Part I,  
340 Streamline Watershed Management Bulletin, 7, 20-23, 2004a.  
341  
342 Moore, R.D.: Introduction to salt dilution gauging for streamflow measurement Part II, constant-  
343 rate injection, Streamline Watershed Management Bulletin, 8, 11-15, 2004b.  
344  
345 Moore, R.D.: Introduction to salt dilution gauging for streamflow measurement Part III, slug  
346 injection using salt in solution, Streamline Watershed Management Bulletin 8, 1-6. 2005.  
347

- 348 Scarpone, C., Schmidt, M.G., Bulmer, C., and Knudby, A.: Modelling soil thickness in the  
349 critical zone for Southern British Columbia, *Geoderma*, 282:59-69, 2016.  
350
- 351 Soil Classification Working Group: The Canadian system of soil classification, 3, Publication  
352 1646, Agriculture and Agri-Food, Canada, 187 pp., 1997.  
353
- 354 Sontek/YSI: Flowtracker Handheld ADV Technical Manual, Firmware Version 3.3, Software  
355 Version 2.20, 2007.
